# Supplementary material
Source: PubMed Central journal article supplement (PMC7585995)
Supplement: 10038_2020_864_MOESM3_ESM.pdf [file 10038_2020_864_MOESM3_ESM.pdf]

### **Korean Kawasaki Disease Genetics Consortium**

In-Sook Park, MD, PhD, Soo-Jong Hong, MD, PhD (Department of Pediatrics, Asan Medical Center, Seoul, 05505 Korea), Sejung Sohn, MD, PhD (Department of Pediatrics, Ewha Womans University College of Medicine, Seoul, 07985 Korea), Kee-Soo Ha, MD, PhD, Hyo-Kyoung Nam, MD, Jung-Hye Byeon, MD (Department of Pediatrics, Korea University Ansan Hospital, Ansan, 15355 Korea), Myung-Ki Han, MD (Department of Pediatrics, University of Ulsan, Gangneung Asan Hospital, Gangneung, 25440 Korea), Jung-Woo Rhim, MD, PhD (Department of Pediatrics, Daejeon St. Mary's Hospital, Daejeon, 34943 Korea), Min Seob Song, MD, PhD (Department of Pediatrics, Inje University Haeundae Paik Hospital, Busan, 48108 Korea), Hyoung Doo Lee, MD, PhD (Department of Pediatrics, Pusan National University Hospital, Busan, 49241 Korea), Dong Soo Kim, MD, PhD (Department of Pediatrics, Yonsei University College of Medicine, Severance Children's Hospital, Seoul, 03722 Korea), Kyung Lim Yoon, MD, PhD (Department of Pediatrics, Kyung Hee University Hospital at Gangdong, Seoul, 05278 Korea), Hong-Ryang Kil, MD, PhD (Department of Pediatrics, Chungnam National University Hospital, Daejeon, 35015 Korea), Gi Beom Kim, MD, PhD (Department of Pediatrics, Seoul National University Children's Hospital, Seoul, 03080 Korea), Jong-Duk Kim, BS (Seoul Clinical Laboratories, Yongin, 16954 Korea).

### **Taiwan Kawasaki Disease Genetics Consortium**

Ho-Chang Kuo, MD, PhD (Department of Pediatrics, Kaohsiung Chang Gung Memorial Hospital, Kaohsiung, 83301 Taiwan), Jeng-Sheng Chang, MD, Fuu-Jen Tsai, MD, PhD, Kao-Pin Hwang, MD, PhD (Department of Pediatrics, China Medical University Hospital, Taichung, 40402 Taiwan), Ming-Ren Chen, MD, Fu-Yuan Huang, MD, PhD (Department

of Pediatrics, Mackay Memorial Hospital, Taipei, 10491 Taiwan), Meng-Luen Lee, MD (Department of Pediatrics and Divisions of Pediatric Cardiology, Changhua Christian Hospital, Changhua, 50050 Taiwan), Betau Hwang, MD, Pi-Chang Lee, MD, PhD (Division of Pediatric Cardiology, Department of Pediatrics, Taipei Veterans General Hospital, Taipei, 112 Taiwan)

### **Taiwan Pediatric ID Alliance**

Li-Min Huang, MD, PhD, Luan-Yin Chang, MD, PhD, Chun-Yi Lu, MD, PhD, Pei-Lan Shao, MD (Department of Pediatrics, National Taiwan University Hospital, Taipei, 100 Taiwan), Nan-Chang Chiu, MD, Hsin Chi, MD, PhD, Daniel Tsung-Ning Huang, MD, PhD (Department of Pediatrics, Mackay Memorial Hospital, Taipei, 10491 Taiwan), Hsiao-Chuan Lin, MD, PhD, Kao-Pin Hwang, MD, PhD, Ting-Yu Yen, MD (Department of Pediatrics, China Medical University Hospital, Taichung, 40402 Taiwan), Yungling Leo Lee, MD, PhD (Institute of Epidemiology and Preventive Medicine, National Taiwan University, Taipei, 100 Taiwan), Ching-Chuan Liu, MD, MPH, Shih-Min Wang, MD, PhD (Department of Pediatrics, National Cheng-Kung University Hospital, Tainan, 70403 Taiwan), Shun-Cheng Yang, MD (Department of Pediatrics, Division of Pediatric Infectious Disease, Changhua Christian Hospital, Changhua, 50050 Taiwan), Yu-Chia Hsieh, MD, PhD, Yhu-Chering Huang, MD, PhD, Cheng-Hsun Chiu, MD, PhD (Department of Pediatrics, Chang Gung Hospital, Taoyuan, 333 Taiwan), Jin-Town Wang, MD, PhD (Department of Microbiology, National Taiwan University College of Medicine, Taipei, 100 Taiwan), Yu-Huai Ho, MD (Department of Pediatrics, Tzu Chi University, Hualien, 97004 Taiwan), Jung-Jung Mu, PhD (Research and Diagnostic Center, Centers for Disease Control, Taipei, 10050 Taiwan), Yi-Chuan Huang, MD

(Department of Pediatrics, Kaohsiung Chang Gung Memorial Hospital, Kaohsiung, 83301 Taiwan)

### **Japan Kawasaki Disease Genome Consortium**

Mitsuru Seki, MD, PhD, Yuji Asami, MD, Tomio Kobayashi, MD, PhD (Department of Cardiology, Gunma Children's Medical Center, Shibukawa, 377-8577 Japan), Hiroshi Masuda, MD (Department of General Pediatrics and Interdisciplinary Medicine, National Center for Child Health and Development, Tokyo, 157-8535 Japan), Toshiaki Jibiki, MD (Department of Pediatrics, Chiba Kaihin Municipal Hospital, Chiba, 261-0012 Japan), Taro Yamazaki, MD, PhD (Department of Pediatrics, Saitama Medical University, Moroyama, 350-0495 Japan), Yoshiaki Okuma, MD, PhD (Department of Pediatrics, National Center for Global Health and Medicine, Tokyo, 162-8655 Japan), Kazunobu Ouchi, MD, PhD (Department of Pediatrics, Kawasaki Medical School, Kurashiki, 701-0192 Japan), Maya Fujiwara, MD, PhD (Department of Pediatrics, Kawakita General Hospital, Tokyo, 166-0001 Japan), Hironaka Urano, MD (Department of Pediatrics, Kiryu Kosei General Hospital, Kiryu, 376-0024 Japan), Yumi Mizuno, MD, PhD (Department of Pediatric Infectious Diseases, Fukuoka Children's Hospital, Fukuoka, 813-0017 Japan), Nobuhiro Fukasawa, MD (Department of Pediatrics, Fujioka General Hospital, Fujioka, 375-0015 Japan), Shigeto Fuse, MD, PhD (Department of Pediatrics, NTT Medical Center Sapporo, Sapporo, 060-0061 Japan), Shinichi Takatsuki, MD (Department of Pediatrics, Toho University Medical Center Omori Hospital, Tokyo, 153-0044 Japan), Kenichi Nishimura, MD (Department of Pediatrics, Yokohama City University Graduate School of Medicine, Yokohama, 236-0004 Japan), Ryuji Fukazawa, MD, PhD (Department of Pediatrics, Nippon Medical School, Tokyo 113-8603 Japan),

Hideko Nishimura, MD, PhD (Department of Pediatrics, Tone Chuo Hospital, Numata, 378-0012 Japan), Yoshimitsu Tsuzuki, MD, PhD (Department of Pediatrics, St. Marianna University School of Medicine, Kawasaki, 216-8511 Japan), Tomoyo Matsubara, MD, PhD (Department of Pediatrics, Dokkyo Medical University Saitama Medical Center, Koshigaya, 343-8555 Japan), Takahisa Mizuno, MD (Department of Pediatrics, Gunma Chuo Hospital, Maebashi, 371-0025 Japan), Satoru Iwashima, MD, PhD (Department of Pediatrics, Hamamatsu University School of Medicine, Hamamatsu, 431-3125 Japan), Mamoru Ayusawa, MD, PhD (Department of Pediatrics and Child Health, Nihon University School of Medicine, Tokyo, 173-8610 Japan), Kazuyuki Ikeda, MD, PhD (Department of Pediatrics, Graduate School of Medical Science, Kyoto Prefectural University of Medicine, Kyoto, 602-8566 Japan), Takashi Kosuda, MD (Department of Pediatrics, Tomioka General Hospital, Tomioka, 370-2316 Japan), Kunio Hashimoto, MD, PhD (Department of Pediatrics, Nagasaki University Graduate School of Biomedical Sciences, Nagasaki, 852-8523 Japan), Kunio Hirasawa, MD (Department of Pediatrics, Fukaya Red Cross Hospital, Fukaya, 366-0052 Japan), Junpei Somura, MD, PhD (Department of Pediatrics, Shiga University of Medical Science, Otsu, 520-2192 Japan), Masaru Miura MD, PhD (Department of Cardiology, Tokyo Metropolitan Children's Medical Center, Toyko, 183-8561 Japan), Megumi Toba, MD (Department of Pediatrics, Minamitama Hospital, Hachioji, 192-0832 Japan), Keiichi Hirono, MD, PhD (Department of Pediatrics, Graduate School of Medicine, University of Toyama, Toyama, 930-0194 Japan), Kentaro Ueno, MD, PhD (Department of Pediatrics, Kagoshima University Graduate School of Medical and Dental Sciences, Kagoshima, 890-8544 Japan), Takasuke Ebato, MD, PhD (Department of Pediatrics, Kitasato University Hospital, Sagamihara, 252-0375 Japan), Hirokazu Arakawa, MD, PhD (Department of Pediatrics,

Gunma University Graduate School of Medicine, Maebashi, 371-8511 Japan), Kouta Ichinose, MD (Department of Pediatrics, Aomori City Hospital, Aomori, 030-0821 Japan), Hiroki Kajino, MD, PhD (Department of Pediatrics, Abashiri-Kosei General Hospital, Abashiri, 093-0076 Japan), Masamune Higashigawa, MD, PhD (Department of Pediatrics, Japanese Red Cross Ise Hospital, Ise, 516-8512 Japan), Noriko Nagai, MD, PhD (Department of Pediatrics, Okazaki City Hospital, Okazaki, 444-8553 Japan), Hayato Aoyagi, MD (Department of Pediatrics, Obihiro Kyokai Hospital, Obihiro, 080-0805 Japan), Seiji Kawamura, MD (Department of Pediatrics, Kameda General Hospital, Kamogawa, 296-8602 Japan), Yoshiaki Kato, MD, PhD (Department of Child Health, Faculty of Medicine, University of Tsukuba, Ibaraki 305-8575 Japan), Masahiro Tahara, MD, PhD (Department of Pediatrics, Tsuchiya General Hospital, Hiroshima, 730-0811 Japan), Hiroshi Suzuki, MD, PhD (Department of Pediatrics, Niigata University Graduate School of Medical and Dental Sciences, Niigata, 951-8510 Japan), Yoichi Kawamura, MD, PhD (Department of Pediatrics, National Defense Medical College, Tokorozawa, 359-8513 Japan), Masahiro Misawa, MD, PhD (Department of Pediatrics, Tokyo Metropolitan Bokutoh Hospital, Tokyo, 130-8575 Japan), Tetsushi Yoshikawa, MD, PhD (Department of Pediatrics, Fujita Health University, Toyoake, 470-1192 Japan), Ryota Ebata, MD, PhD (Department of Pediatrics, Chiba University Graduate School of Medicine, Chiba, 260-8670, Japan).
